# Supplementary material
Source: PubMed Central journal article supplement (PMC6089355)
Supplement: NIHMS981549-supplement-1.pdf [file NIHMS981549-supplement-1.pdf]

Supplemental Table 1<sup>1</sup>

| Panel Info     |           |           |              | C57BL /6J     | 304/304 | 0/304   | 300/304  | 300/304  | 152/304 | 152/304 |
|----------------|-----------|-----------|--------------|---------------|---------|---------|----------|----------|---------|---------|
|                |           |           |              | 129S1 /SvlmJ  | 0/304   | 304/304 | 4/304    | 4/304    | 152/304 | 152/304 |
|                |           |           |              | C57BL /6J     | 100.00% | 0.00%   | 98.68%   | 98.68%   | 50.00%  | 50.00%  |
|                |           |           |              | 129S1 /SvlmJ  | 0.00%   | 100.00% | 1.32%    | 1.32%    | 50.00%  | 50.00%  |
|                |           |           |              | Sample        | B6J     | 129S    | 455187 1 | 455187 2 | Het1    | Het2    |
| SNP_ID         |           |           |              | Expected SNPs |         |         |          |          |         |         |
| Chromosome- bp | RS_ID     | C57BL /6J | 129S1/Svl mJ |               | A10     | A12     | B07      | B08      | B10     | B12     |
| 02-020551513-M | rs4139548 | A         | G            |               | A       | G       | G        | G        | G/A     | G/A     |
| 02-041042651-M | rs3697051 | C         | G            |               | C       | G       | G        | G        | G/C     | G/C     |

<sup>1</sup> **SNP analysis of *Il36g*<sup>-/-</sup> mice.** Two *Il36g*<sup>-/-</sup> mice from different litters were analyzed for B6 vs 129 DNA content by a 150 marker Jackson Labs analysis. Columns represent samples tested. 455187 1 and 455187 2 are *Il36g*<sup>-/-</sup> mice from our colony, other columns are no template, B6, 129, and B6/129 heterozygous controls. Summary statistics are listed in the rows at the top of the table. The two 129 SNPs observed in our *Il36g*<sup>-/-</sup> mice are listed in rows and identified by chromosome location and RS ID. B6 loci are shown in green, 129 in tan, and heterozygous in yellow. *Il36g* is located at chr2-24186746 thru chr2-24193567.

## Supplemental Figure 1

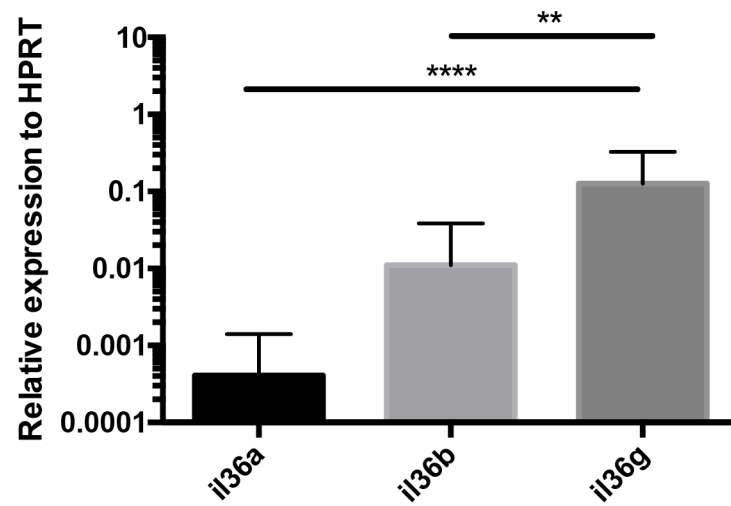

**Supplemental Figure 1: Expression of *Il36* family members in naïve mice as reported in Figure 1 A-C.** Expression of the three *Il36* genes in naïve mice was compared to each other using ANOVA followed by Holm-Sidak multiple comparisons test.

## Supplemental Figure 2

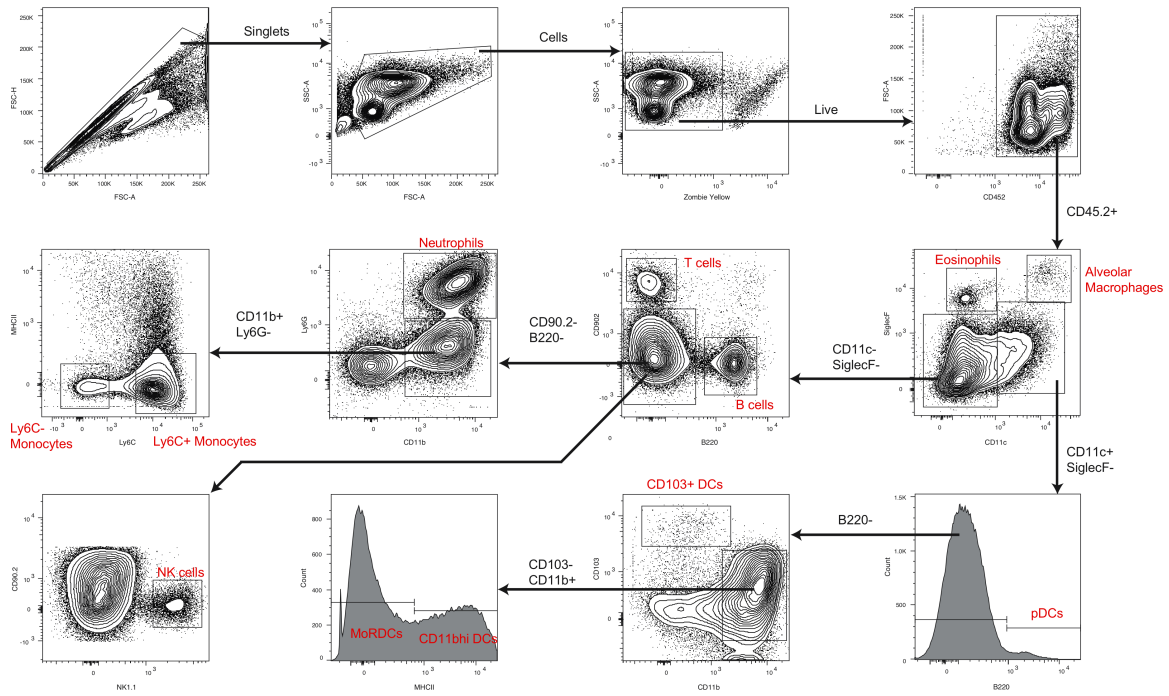

### Supplemental Figure 2: Gating strategy for innate immune cell subsets in the lung.

Example flow cytometry staining for the analysis of lung immune cell subsets. Gating strategy is noted by black arrows and cell subsets analyzed are identified in red text adjacent to gates.
